# Supplementary material for: A unified genetic, computational and experimental framework identifies functionally relevant residues of the homing endonuclease I-BmoI
Source: PubMed Central journal article supplement — Nucleic Acids Res. 2010 Jan 8;38(7):2411–27. doi: 10.1093/nar/gkp1223 (PMC2853131; doi:10.1093/nar/gkp1223), 2010-01-08

The WT, N12D, and I71N time-course data were fit via regularized nonlinear least-squares to the first-order kinetic model

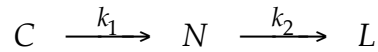

which describes the stepwise conversion of DNA from circular to nicked to linear form. Regression curves (Figure S4) are shown overlaid with data and empirical monotonic Hermite smoothing-spline interpolants. These figures show no inconsistency between the first order kinetic model and the observed data for WT, N12D and I71N proteins.

In contrast, the first-order model above cannot account for the behavior of the I67N or S20Q mutants. Instead, values of  $k_1$  were estimated in the absence of nicked or linear forms. For S20Q, circular DNA concentrations were fit to the empirical formula

$$C = C_0 + \exp(-\kappa_1 t + \kappa_2) + \kappa_3$$

where the comparable initial reaction velocity is given as  $k_1 = \kappa_1 e^{\kappa_2}$ . This empirical model could not reproduce the dynamic behavior of the I67N mutant due to the rapid initial conversion of C to N. Instead, the initial reaction velocity was estimated by the slope of the smoothing spline at time zero. The empirical differences in reaction kinetics between the I67N and S20Q mutants suggest that each has distinct mechanistic changes compared to each other, not just WT.

Since the total concentration of circular, nicked, and linear DNA is presumed constant, a ternary plot showing the relative proportion of each component is presented in Figure S4. Ternary-plot trajectories are displayed without regard to time, and the overall shapes of the reaction regression curves suggest mechanistic differences without regard to differences in reaction rate. Specifically, the plot suggests that the (WT, N12D, I71N), (I67N), and (S20Q) reaction curves are all mechanistically distinct since they group into three observably different classes.

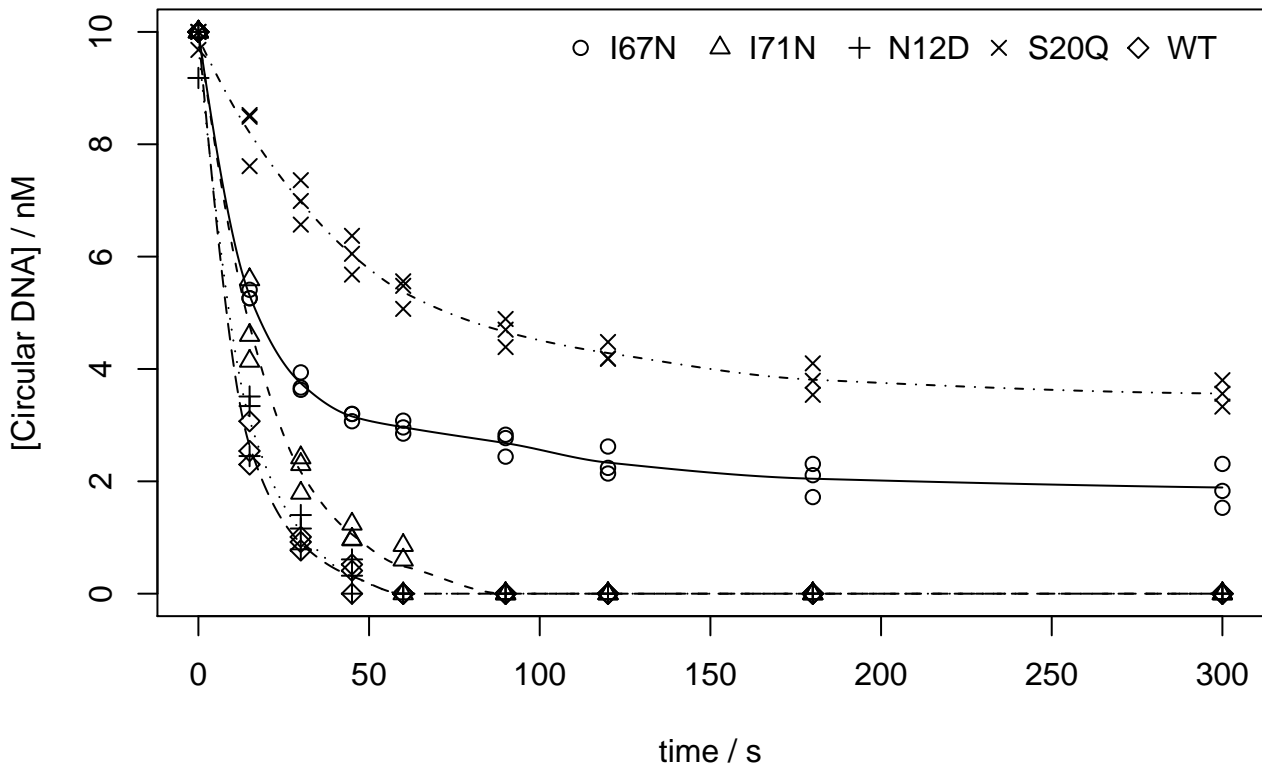

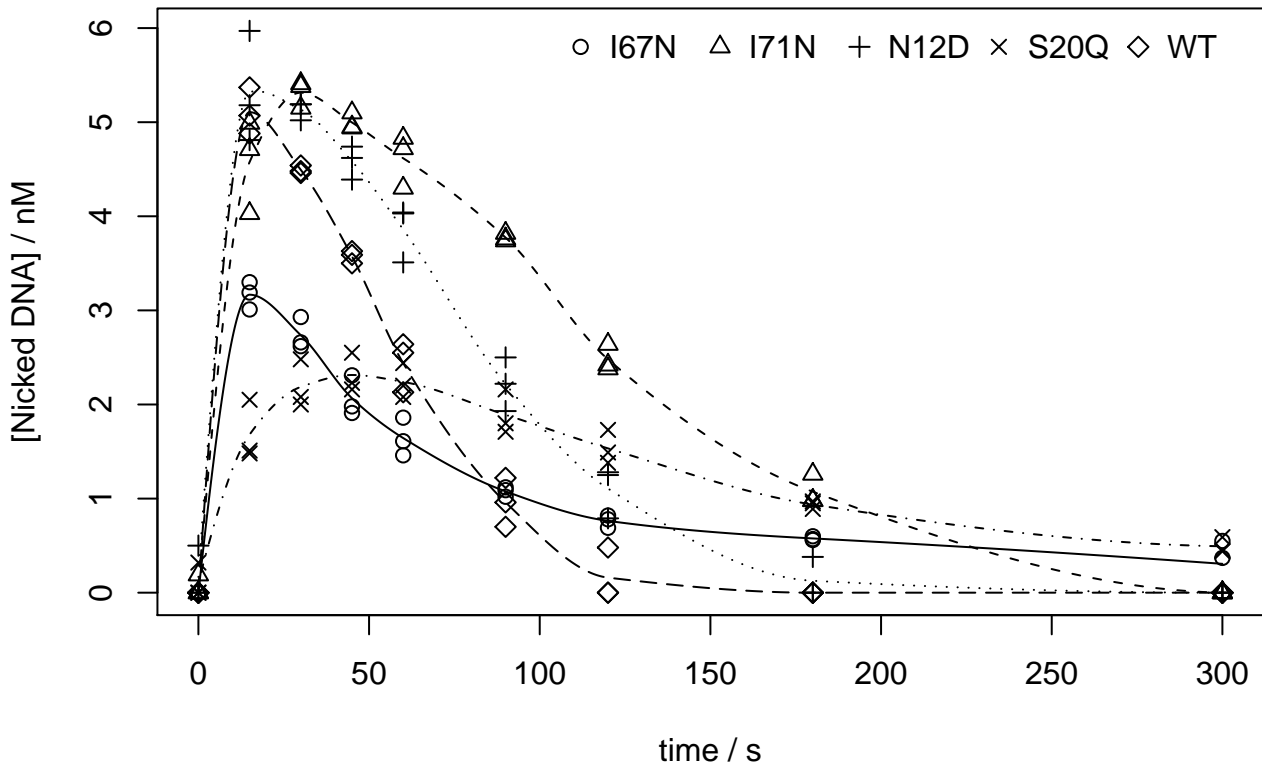

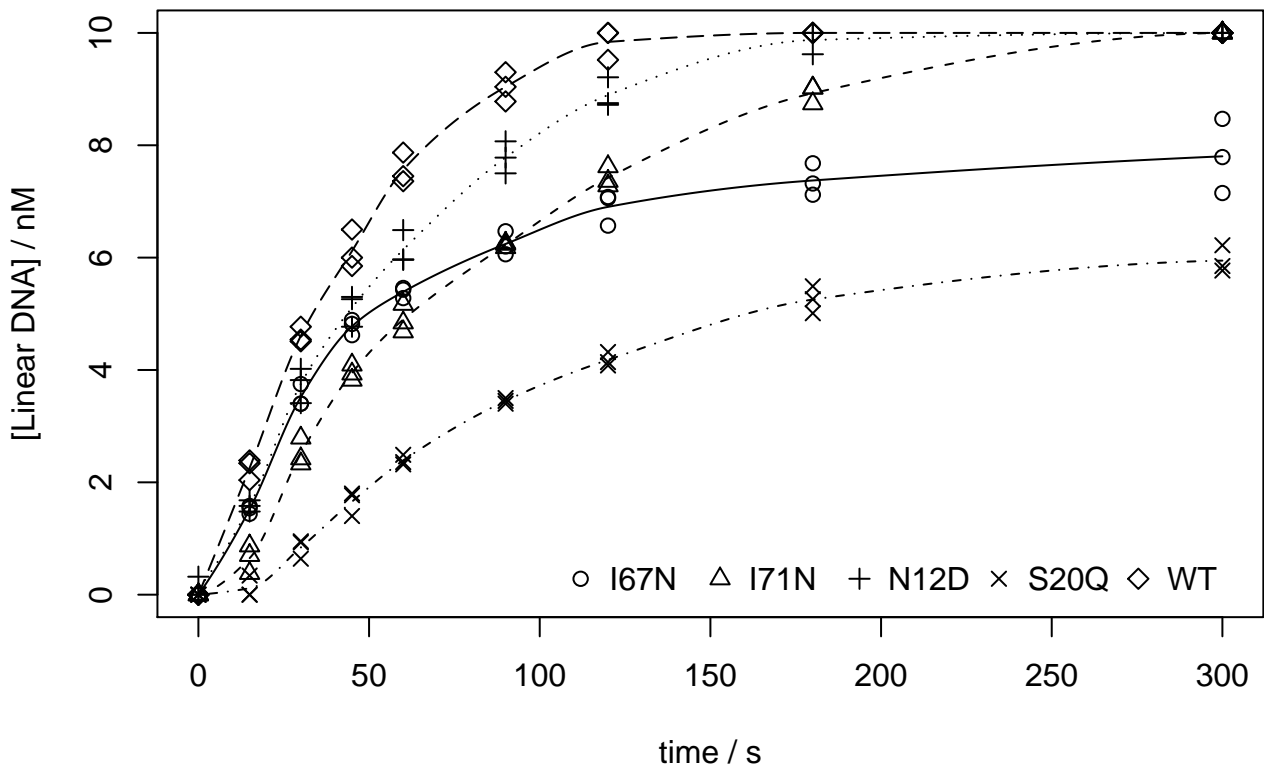

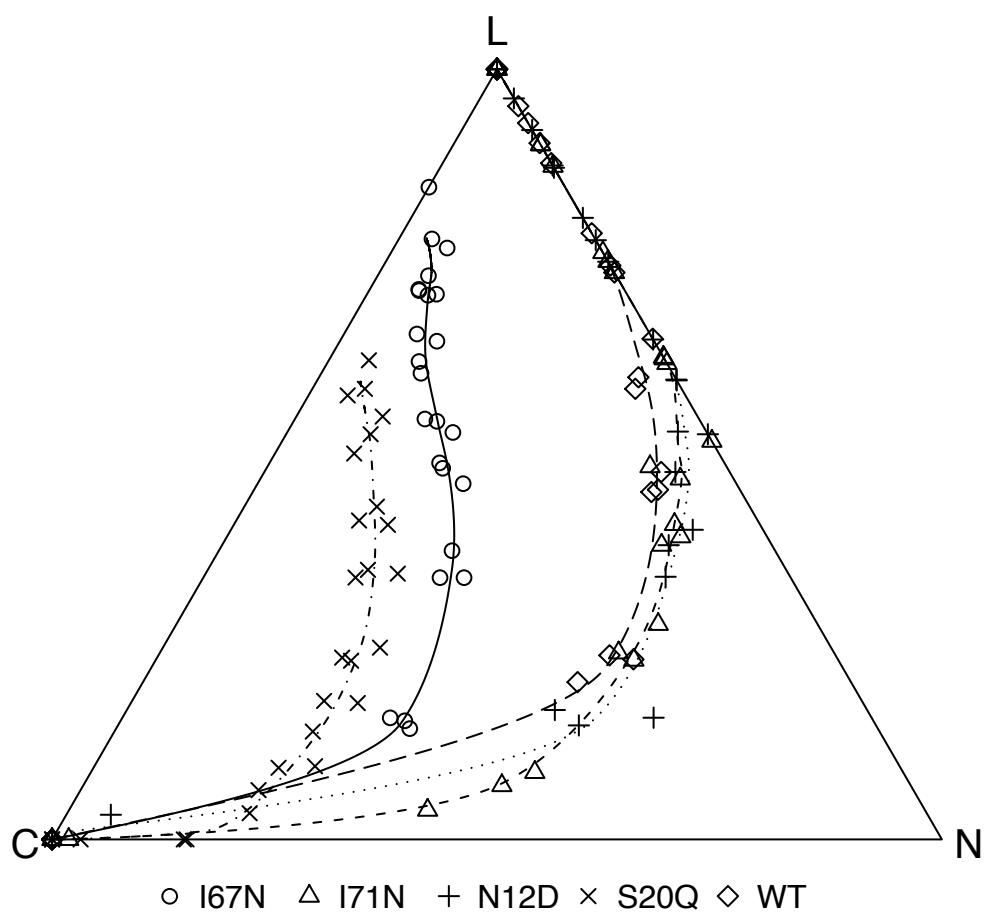

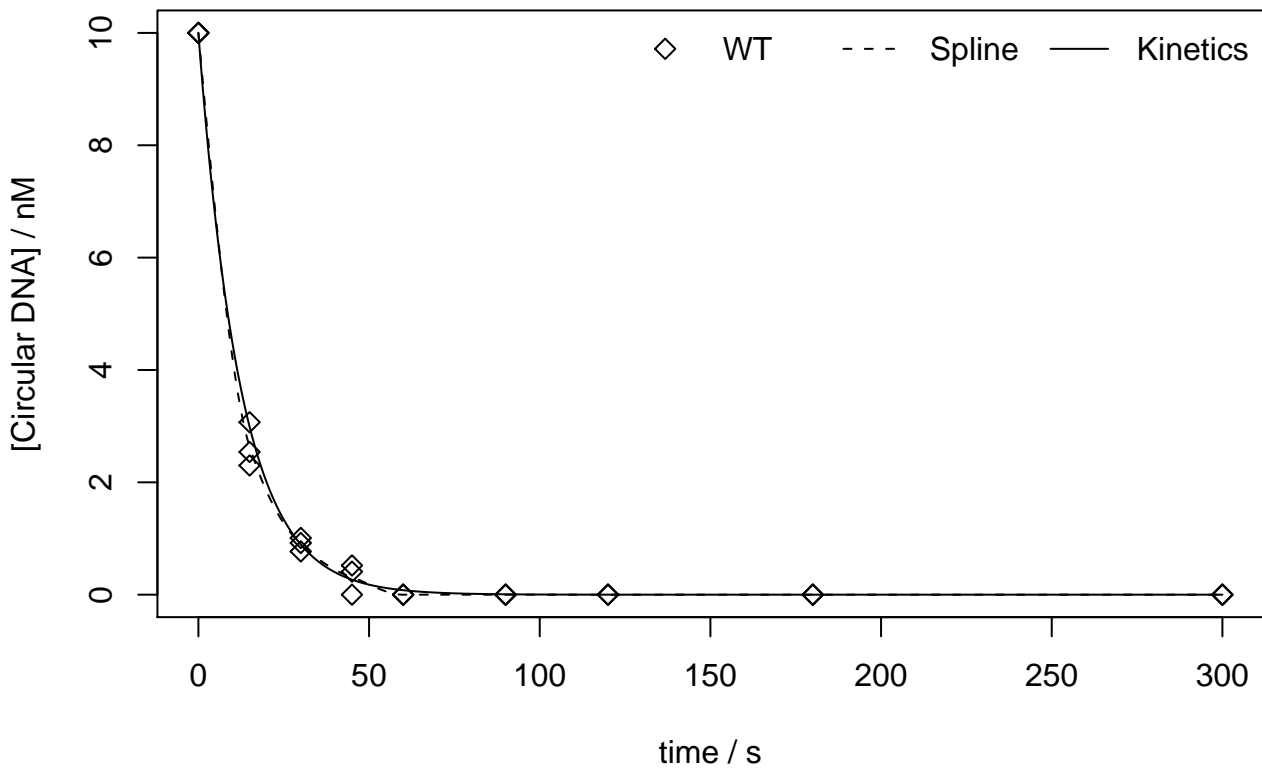

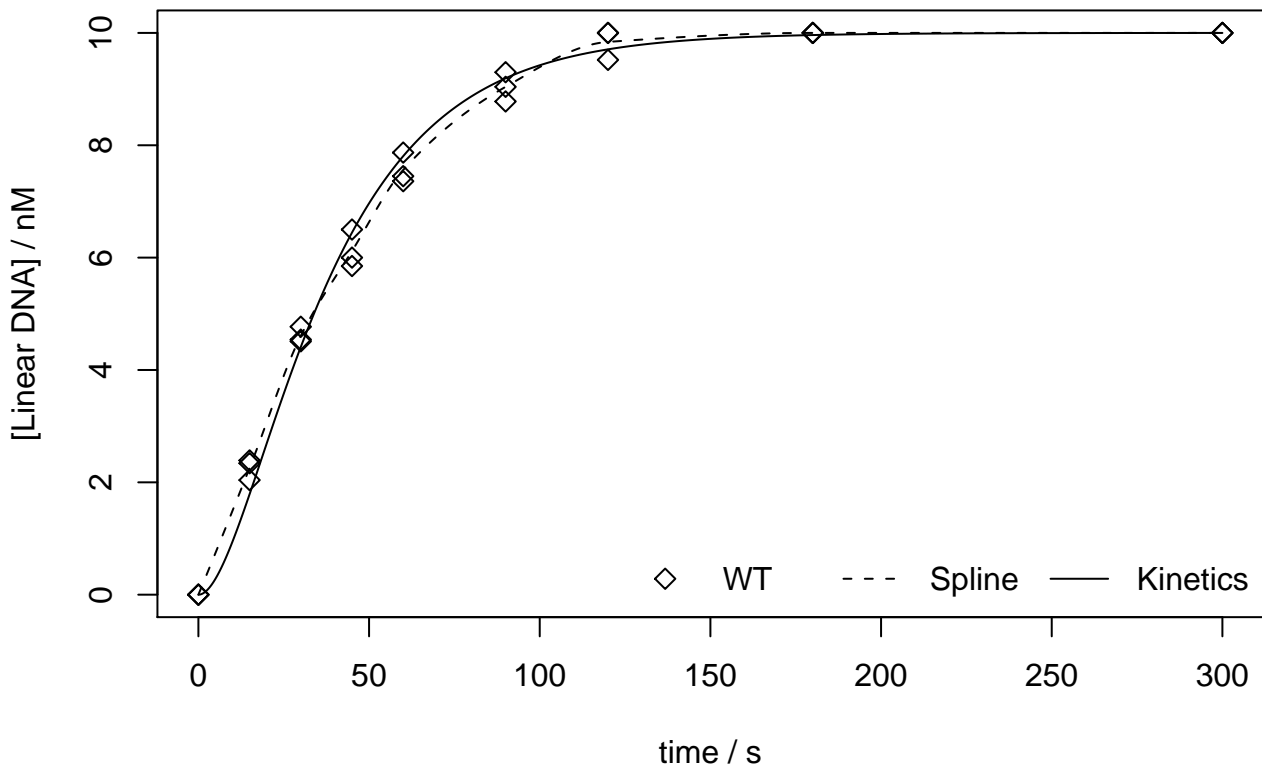

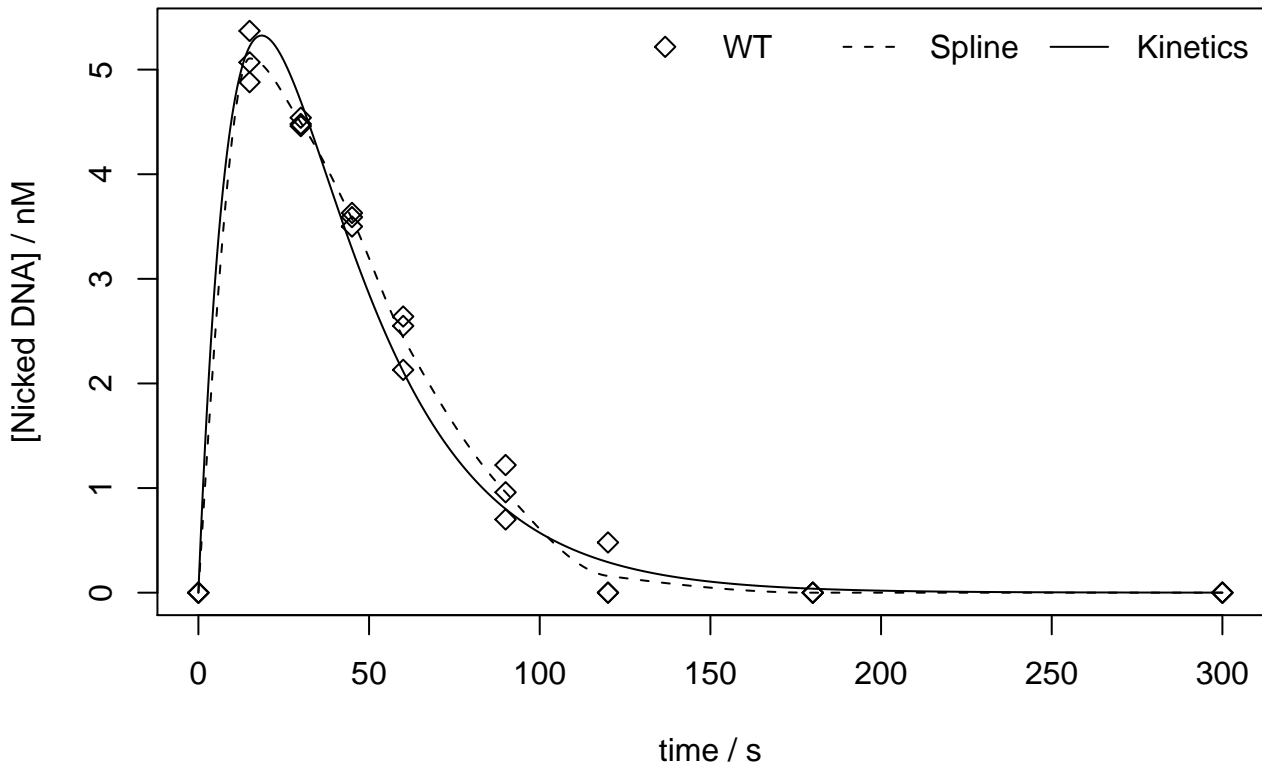



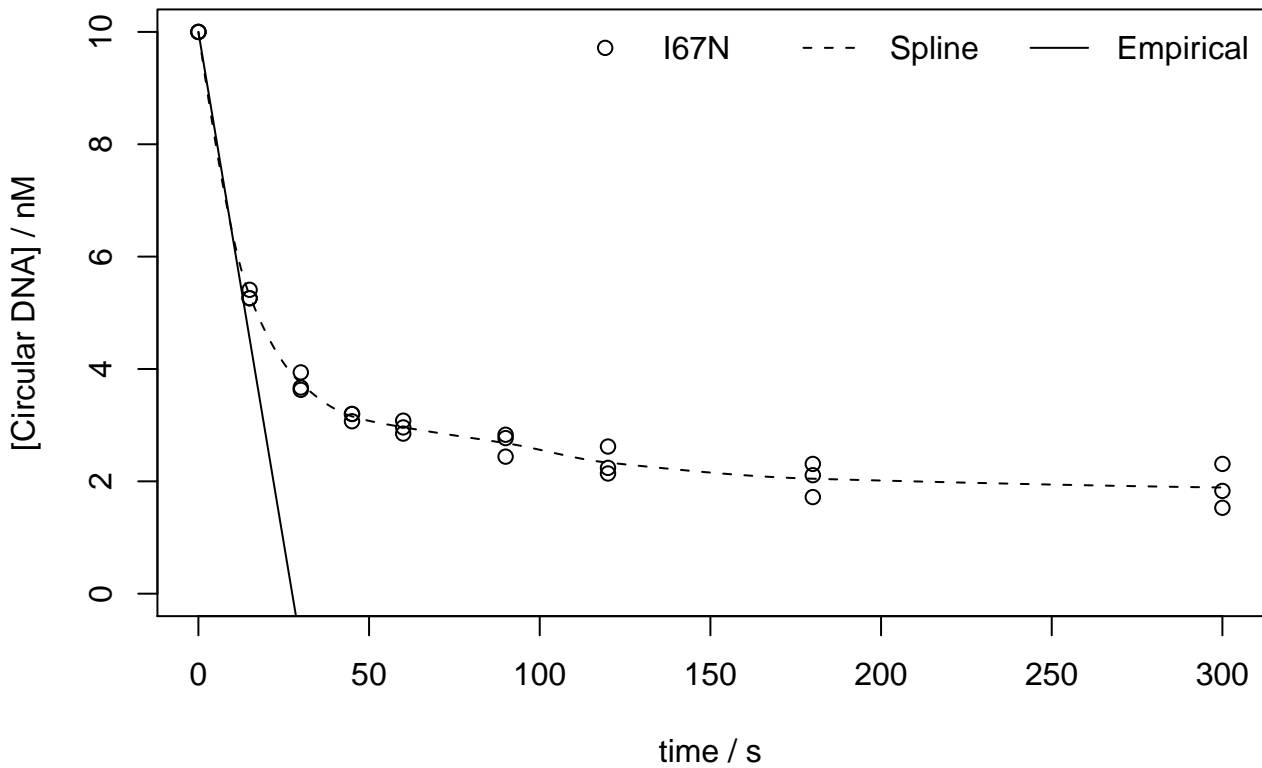

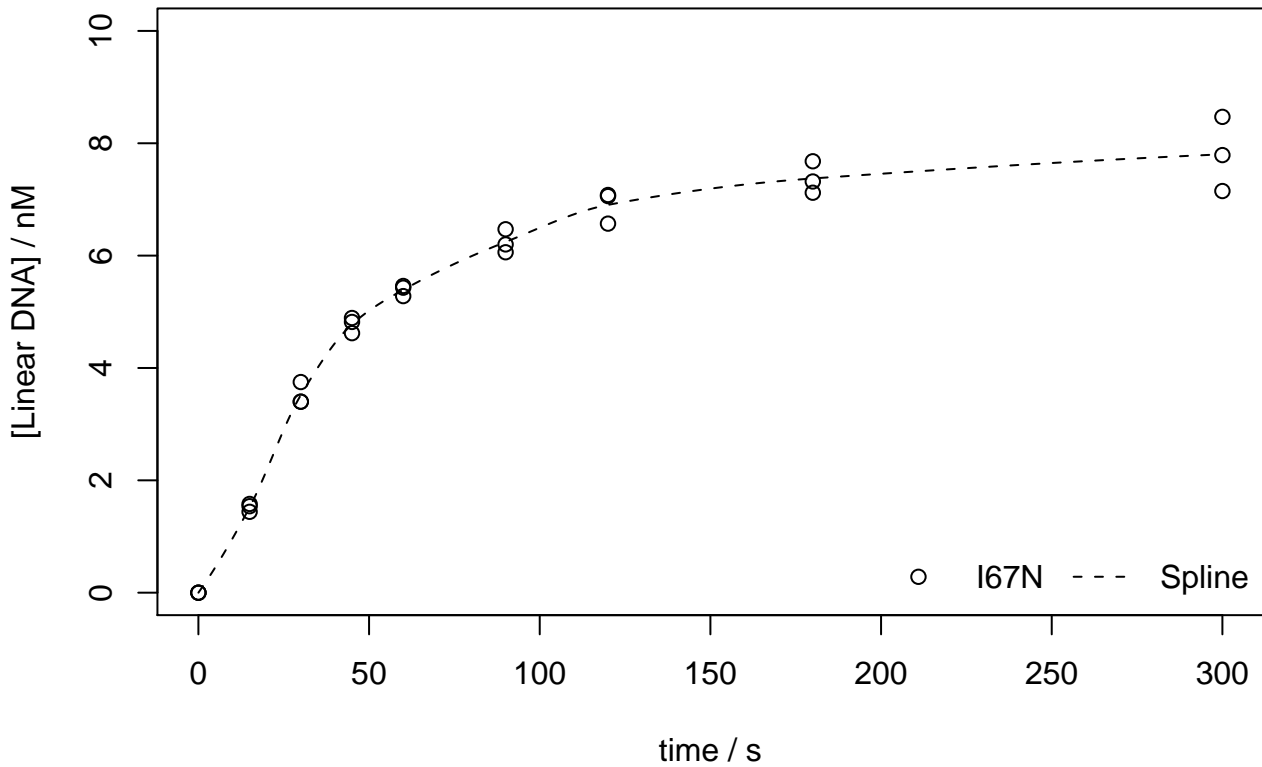

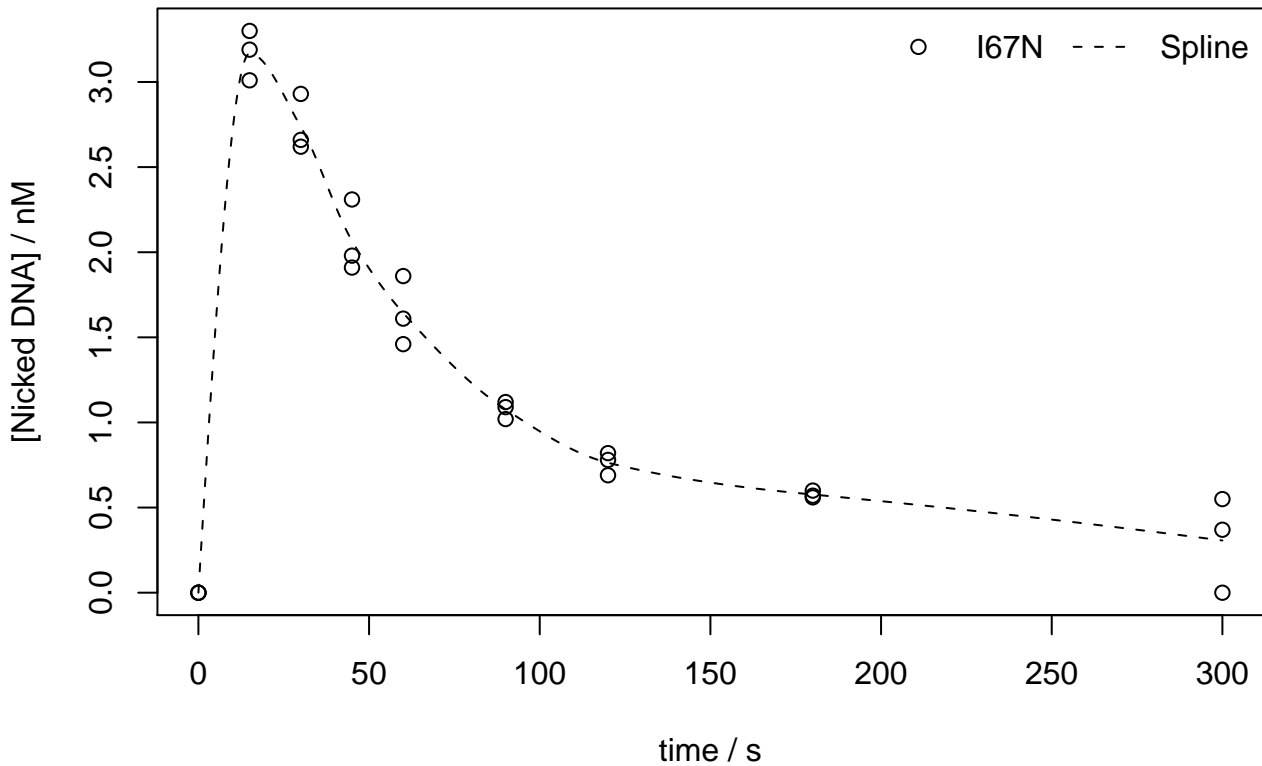

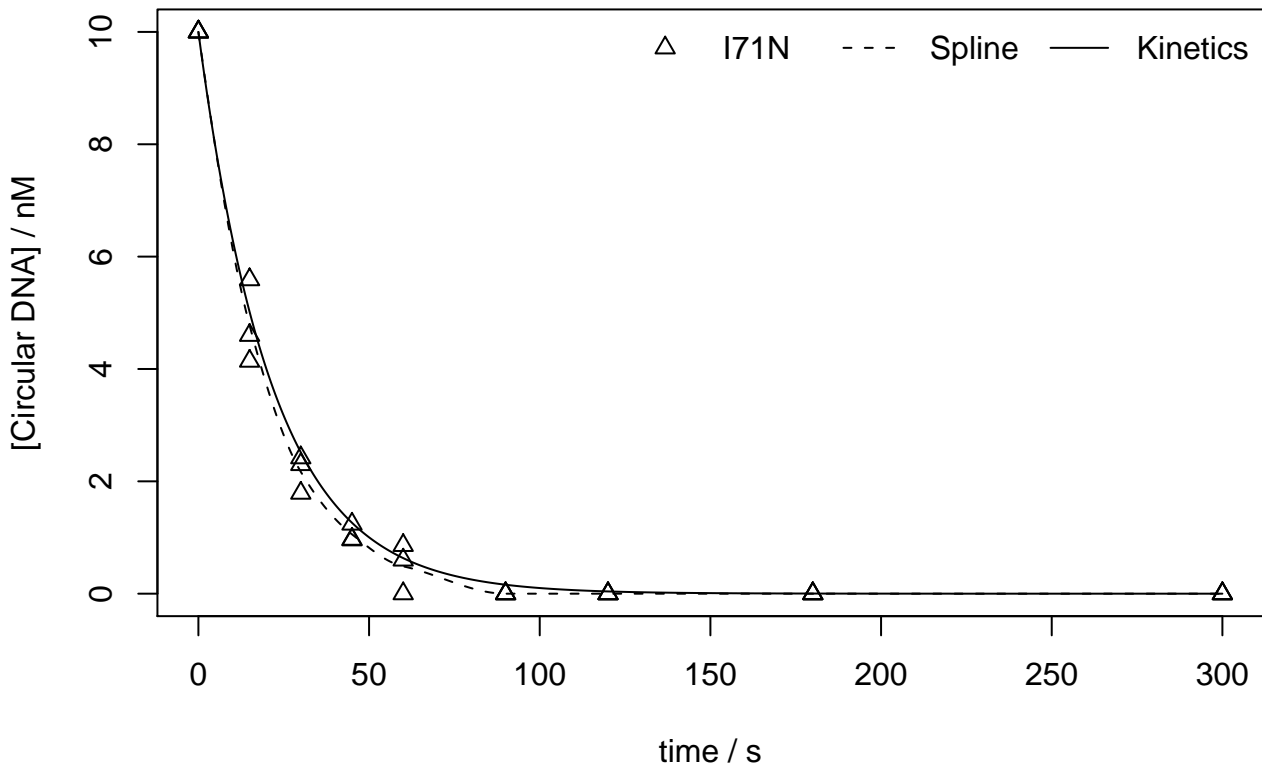

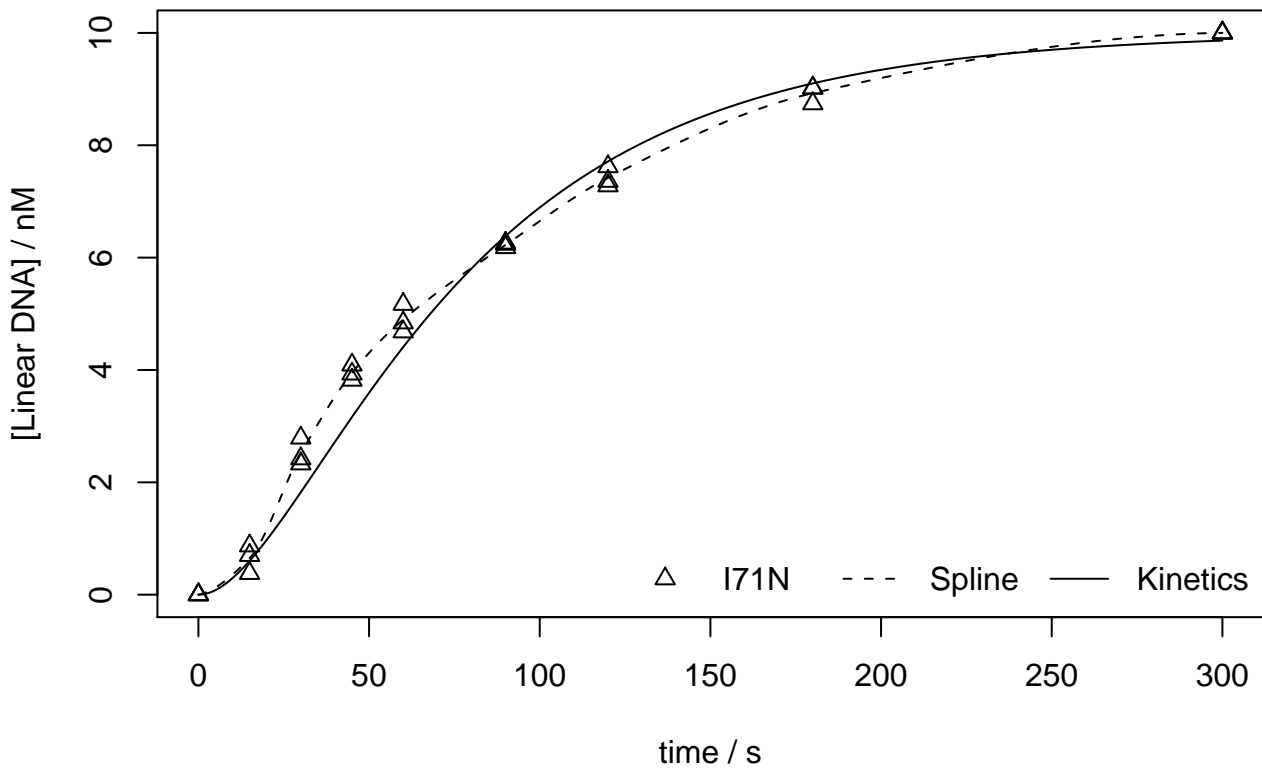

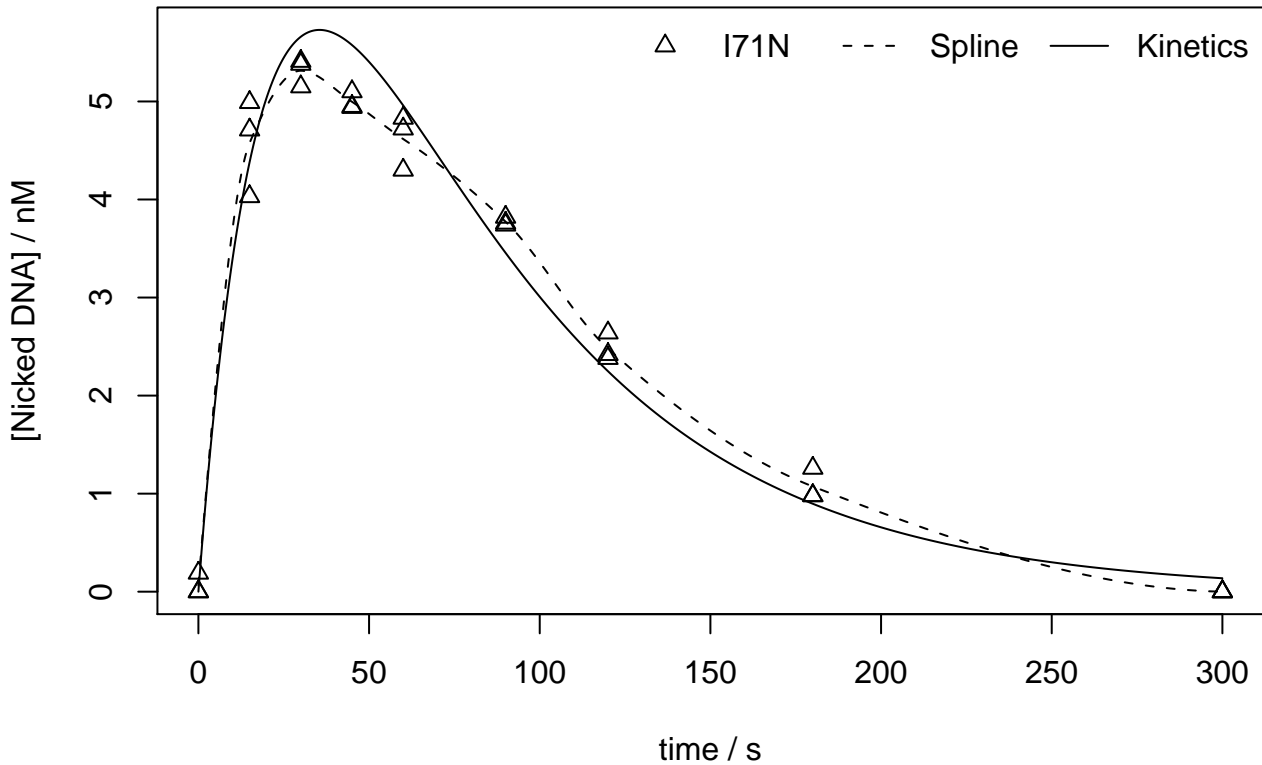

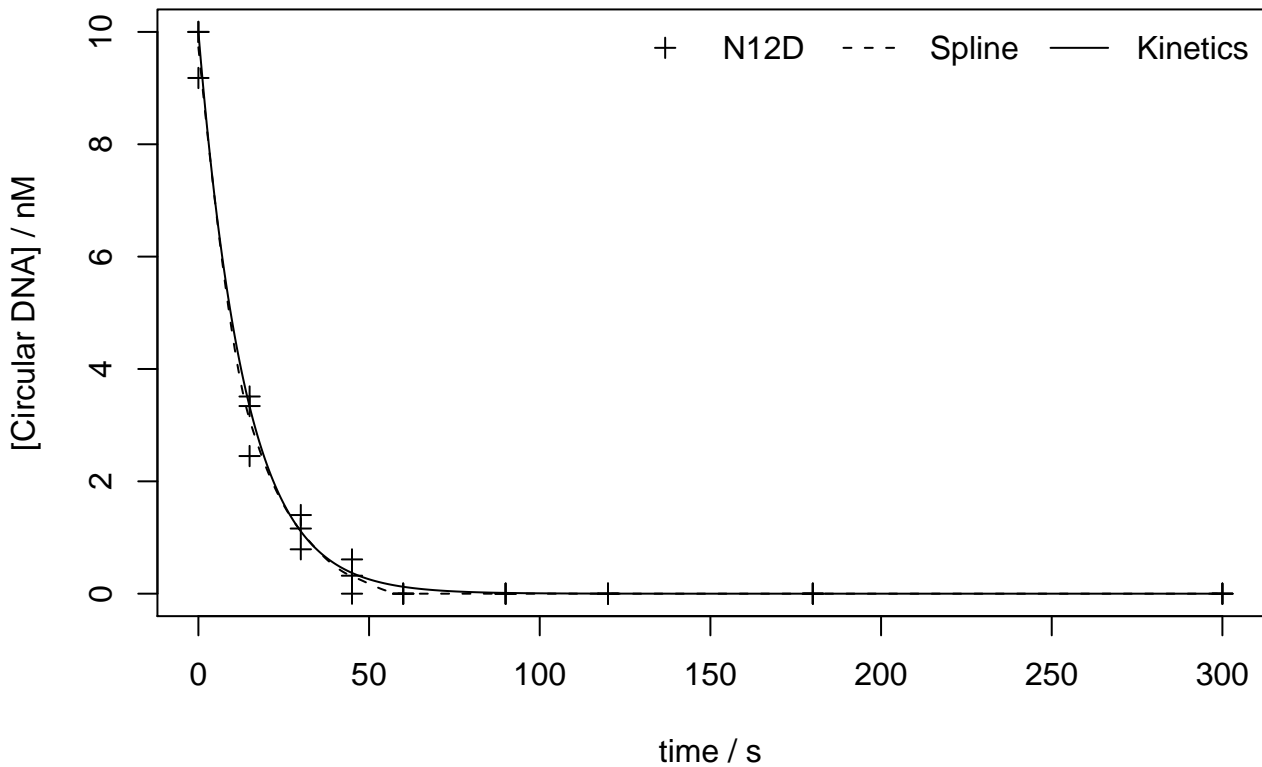

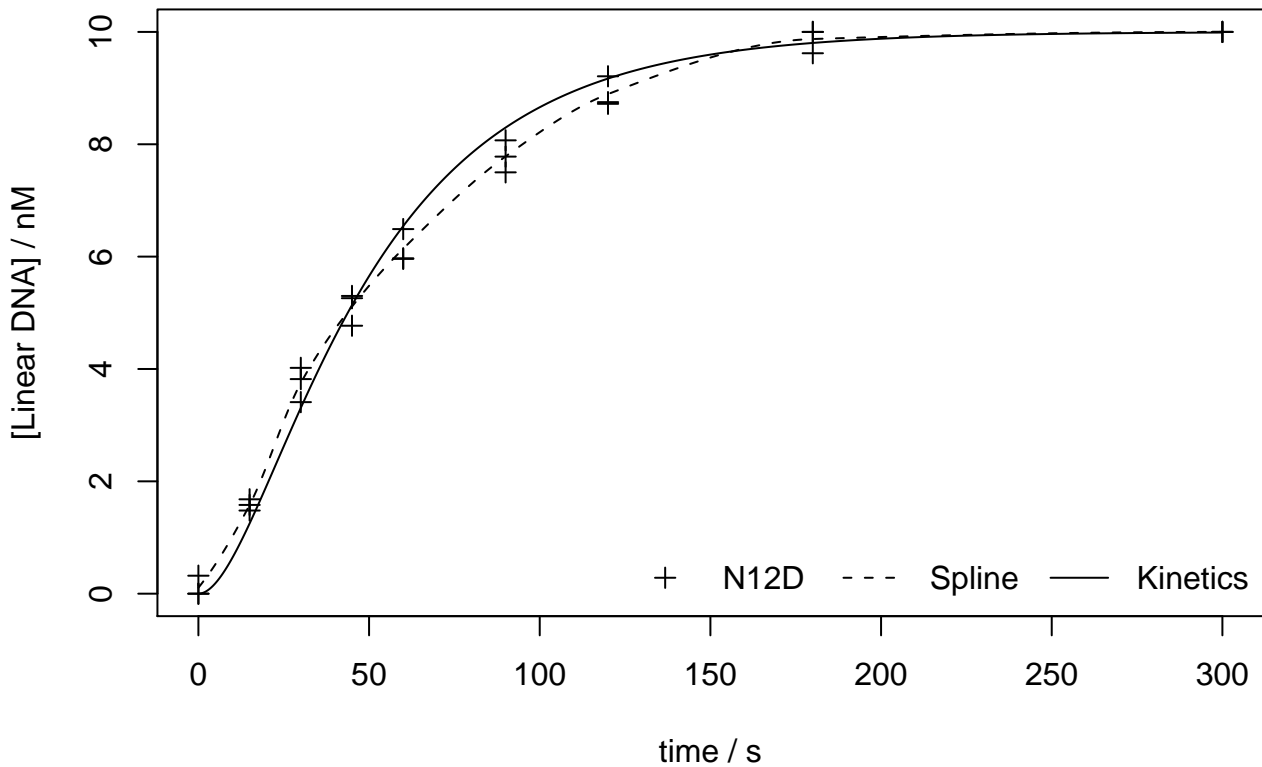



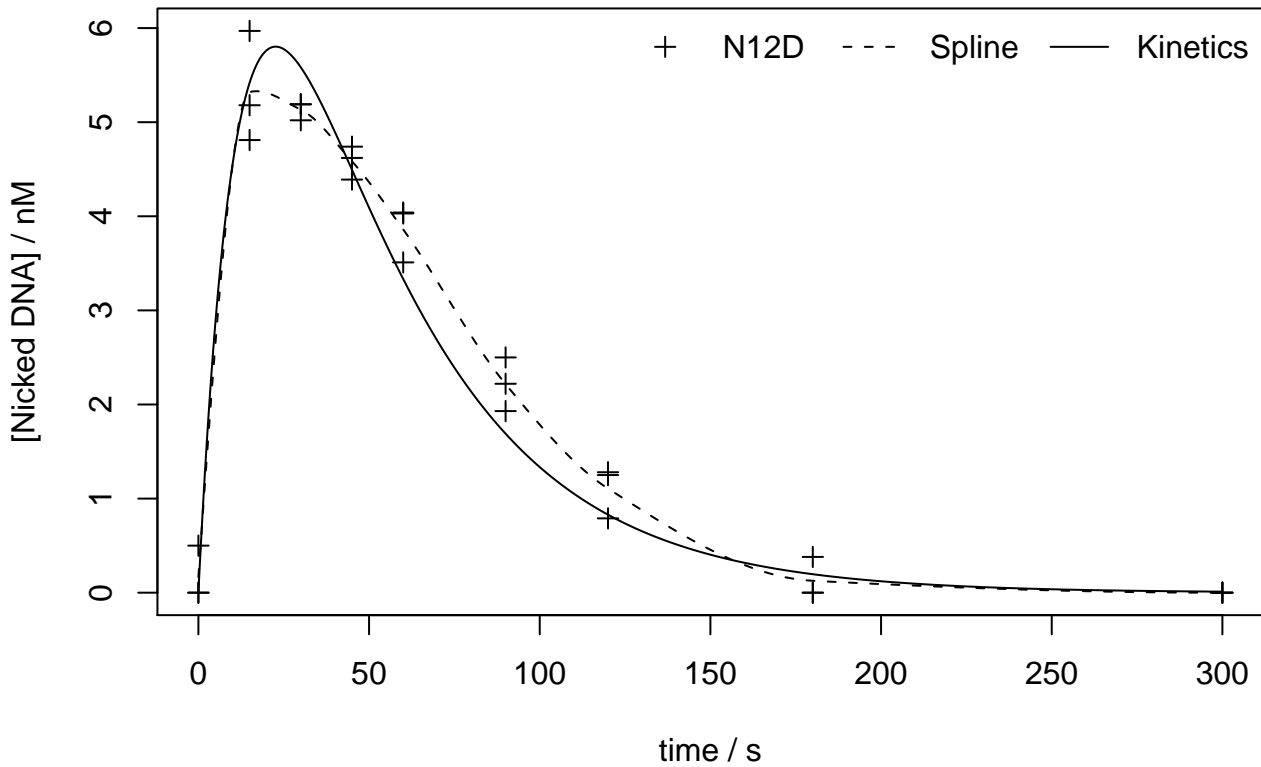

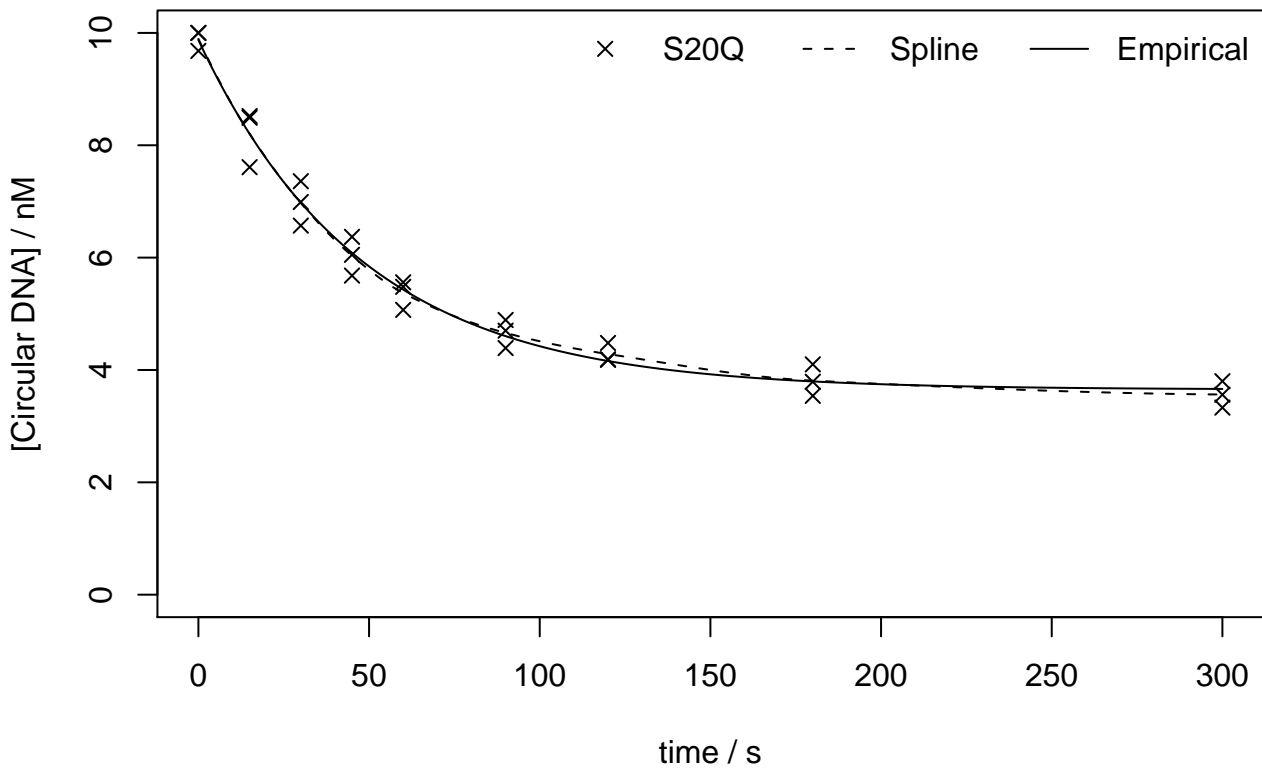

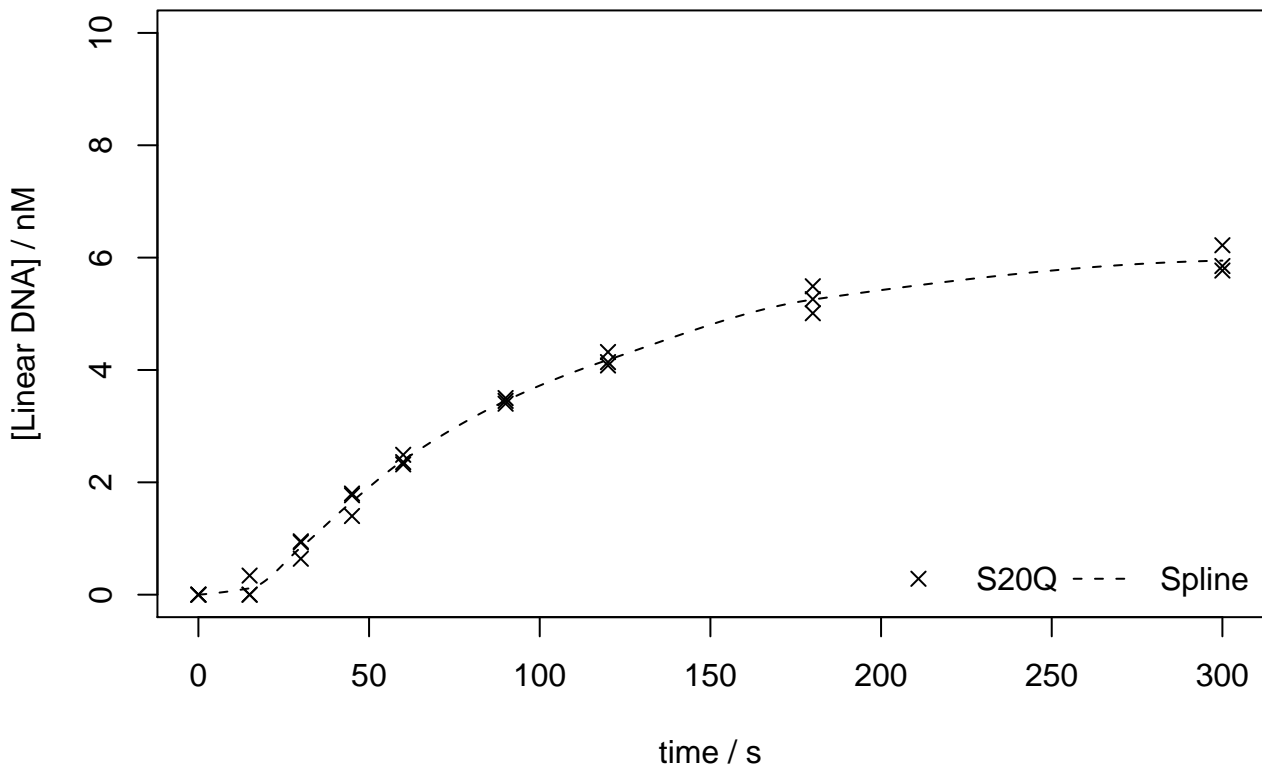

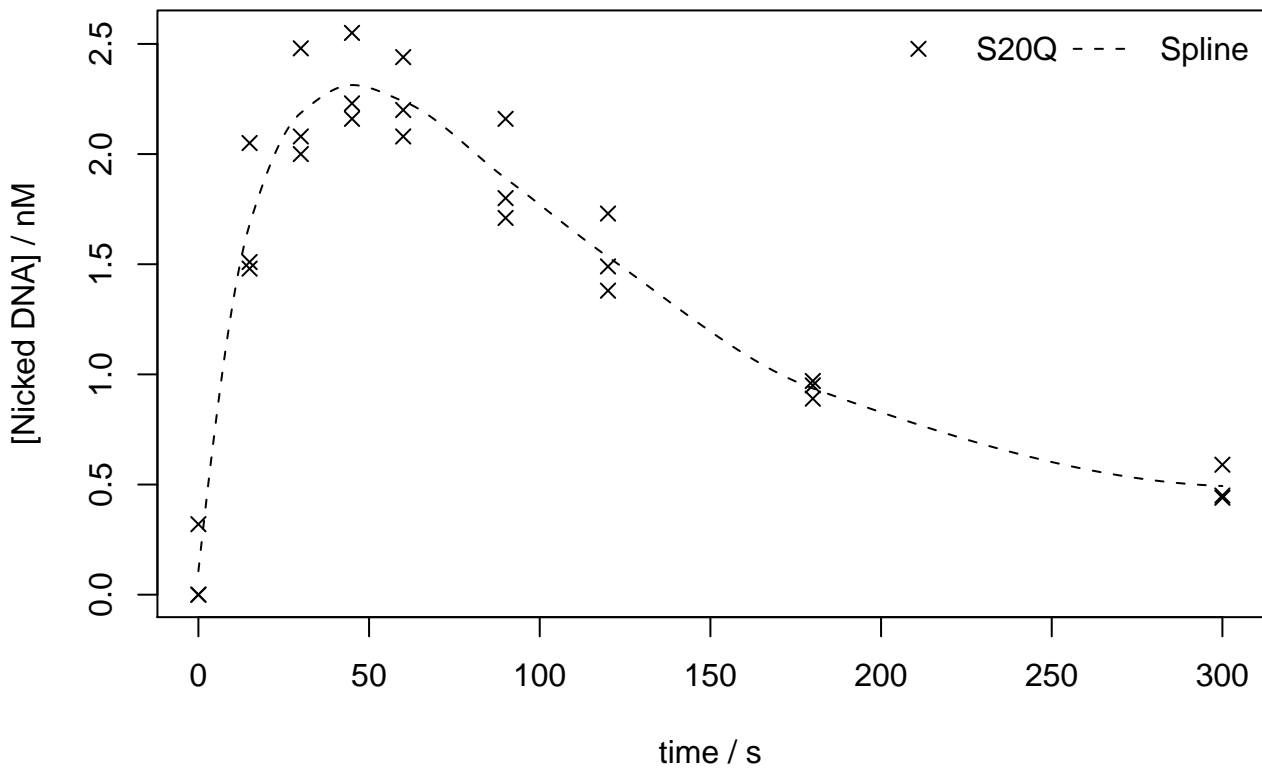

Supplement: gkp1223_1.pdf [file gkp1223_1.pdf]
